# Supplementary material for: Production of Promising Heat-Labile Enterotoxin (LT) B Subunit-Based Self-Assembled Bioconjugate Nanovaccines against Infectious Diseases
Source: MDPI journal article supplement (doi:10.3390/vaccines12040347), 2024-03-23
Supplement: s1 [file s1]

## Supplementary Material

### Supplementary Table S1: Endotoxin level of the *Salmonella paratyphi* A nanovaccines.

Table S1: Endotoxin level of the *Salmonella paratyphi* A nanovaccines.

| Sample ID                     | Endotoxin (EU/mL) |
|-------------------------------|-------------------|
| PBS                           | 7.5±0.007         |
| NP(LTIB)-OPS <sub>SPA</sub>   | 16.7±0.011        |
| NP(LTIIbB)-OPS <sub>SPA</sub> | 23.6±0.004        |

### Supplementary Table S2: Endotoxin level of the *Shigella flexneri* 2a nanovaccines.

Table S3: Endotoxin level of the *Shigella flexneri* 2a nanovaccines.

| Sample ID                    | Endotoxin (EU/mL) |
|------------------------------|-------------------|
| NP(LTIB)-OPS <sub>Kp</sub>   | 18.5±0.003        |
| NP(LTIIbB)-OPS <sub>Kp</sub> | 22.7±0.005        |

### Supplementary Table S3: Endotoxin level of the *Klebsiella pneumoniae* O2 serotype nanovaccines.

Table S3: Endotoxin level of the *Klebsiella pneumoniae* O2 serotype nanovaccines.

| Sample ID                    | Endotoxin (EU/mL) |
|------------------------------|-------------------|
| NP(LTIB)-OPS <sub>Sf</sub>   | 22.8±0.006        |
| NP(LTIIbB)-OPS <sub>Sf</sub> | 22.5±0.016        |

**Supplementary Figure S1: The whole blot (uncropped blots) of Figure 1B.**

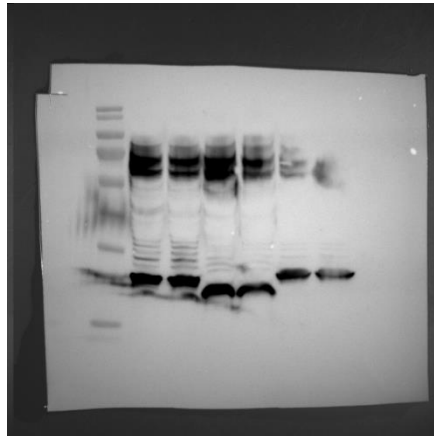

Analysis of the glycoproteins by HRP-conjugated anti-6 $\times$ His tag antibodies. From left to right, lane 1 is a protein ladder - from top to bottom - 140, 115, 80, 65, 50, 40, 30, 25, 15, 10 kDa. Lane 5 is 50973DWL/LT2 containing the plasmid pPglL-LTIIBTri with IPTG induction, and the integrated density of bands was 37864.236. Lane 6 is 50973DWL/LT2 containing the plasmid pPglL-LTIBTri with IPTG induction, and the integrated density of bands was 19630.555. Other lanes were not relevant to this study.

**Supplementary Figure S2: The whole blot (uncropped blots) of Figure 1E.**

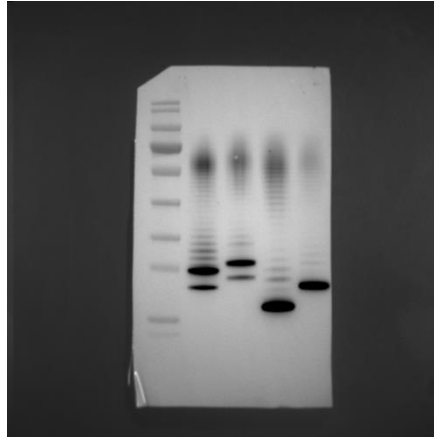

Analysis of the glycoproteins by HRP-conjugated anti-6 $\times$ His tag antibodies. From left to right, lane 1 is a protein ladder - from top to bottom - 140, 115, 80, 65, 50, 40, 30, 25, 15, 10 kDa, lane 3 is glycoprotein LTIBTri-OPS<sub>SPA</sub> and lane 5 is glycoprotein LTIIbBTri-OPS<sub>SPA</sub> were separated by SDS-PAGE and transferred to nitrocellulose membranes for Western Blot analysis using HRP-conjugated anti-6  $\times$  His tag antibodies. The integrated density of bands was 24534.884 and 16297.789 respectively. Other lanes were not relevant to this study.

**Supplementary Figure S3: The whole blot (uncropped blots) of Figure 1E.**

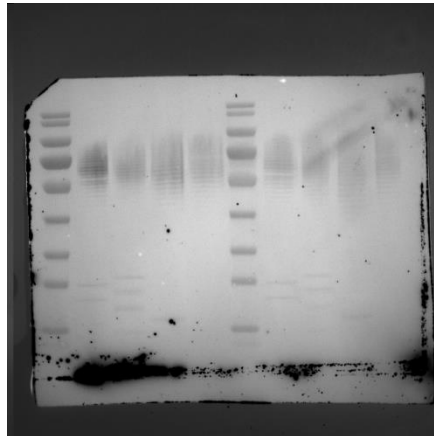

From left to right, lane 6 is protein ladder - from top to bottom - 140, 115, 80, 65, 50, 40, 30, 25, 15, 10 kDa. Lane 8 is glycoprotein LTIBTri-OPS<sub>SPA</sub> and lane 10 is glycoprotein LTIIbBTri-OPS<sub>SPA</sub> were separated by SDS-PAGE and transferred to nitrocellulose membranes for Western Blot analysis using rabbit anti *S. paratyphi* A CMCC strain 50973 OPS serums. The integrated density of bands was 34141.458 and 182241.919 respectively. Other lanes were not relevant to this study.

**Supplementary Figure S4: The whole blot (uncropped blots) of Figure 5A.**

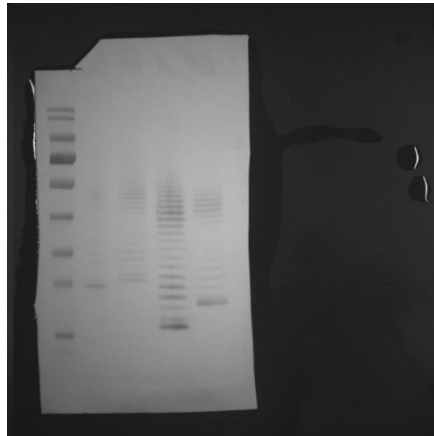

From left to right, lane 1 is protein ladder - from top to bottom - 140, 115, 80, 65, 50, 40, 30, 25, 15, 10 kDa. Lane 3 is nanovaccines NP(LTIB)-OPS<sub>Sf</sub> and lane 5 is nanovaccines NP(LTIIbB)-OPS<sub>Sf</sub> pellets were separated by SDS-PAGE and transferred to nitrocellulose membranes for Western Blot analysis using HRP-conjugated anti-6×His tag antibodies. The integrated density of bands was 11452.294 and 19275.092 respectively. Other lanes were not relevant to this study.

**Supplementary Figure S5: The whole blot (uncropped blots) of Figure 5A.**

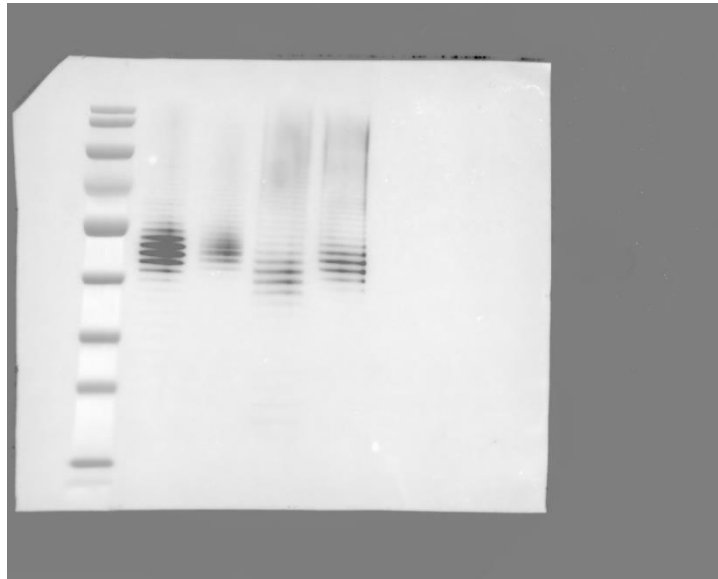

From left to right, lane 1 is protein ladder - from top to bottom - 140, 115, 80, 65, 50, 40, 30, 25, 15, 10 kDa. Lane 3 is nanovaccines NP(LTIB)-OPS<sub>Sf</sub> and lane 5 is nanovaccines NP(LTIIbB)-OPS<sub>Sf</sub> pellets were separated by SDS-PAGE and transferred to nitrocellulose membranes for Western Blot analysis using rabbit anti *S. flexneri* 2a strain 301 OPS serums. The integrated density of bands was 27389.052 and 33547.449 respectively. Other lanes were not relevant to this study.

**Supplementary Figure S6: The whole blot (uncropped blots) of Figure 5B.**

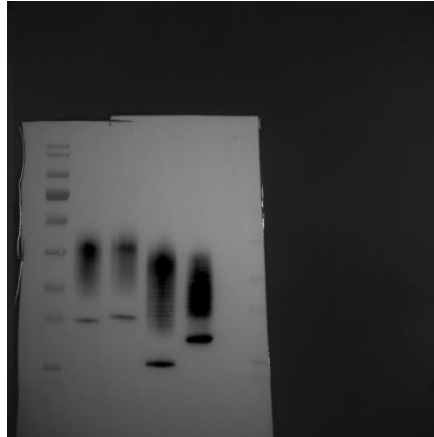

From left to right, lane 1 is protein ladder - from top to bottom - 140, 115, 80, 65, 50, 40, 30, 25, 15, 10 kDa. Lane 3 is nanovaccines NP(LTIB)-OPS<sub>Kp</sub> and lane 5 is nanovaccines NP(LTIIbB)-OPS<sub>Kp</sub> pellets were separated by SDS-PAGE and transferred to nitrocellulose membranes for Western Blot analysis using HRP-conjugated anti-6×His tag antibodies. The integrated density of bands was 25603.516 and 77435.014 respectively. Other lanes were not relevant to this study.

**Supplementary Figure S7: The whole blot (uncropped blots) of Figure 5B.**

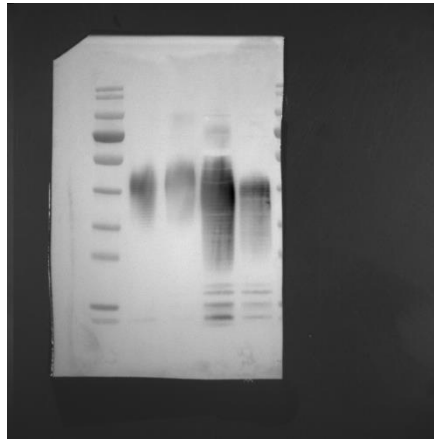

From left to right, lane 1 is protein ladder - from top to bottom - 140, 115, 80, 65, 50, 40, 30, 25, 15, 10 kDa. Lane 3 is nanovaccines NP(LTIB)-OPS<sub>Kp</sub> and lane 5 is nanovaccines NP(LTIIbB)-OPS<sub>Kp</sub> pellets were separated by SDS-PAGE and transferred to nitrocellulose membranes for Western Blot analysis using rabbit anti *K. pneumoniae* strain 355 OPS serums. The integrated density of bands was 14625.688 and 26009.597 respectively. Other lanes were not relevant to this study.
